# Supplementary material for: Potential drug-drug interactions and their associated factors in hospitalized COVID-19 patients with comorbidities
Source: PeerJ. 2023 Jun 28;11:e15072. doi: 10.7717/peerj.15072 (PMC10314741; doi:10.7717/peerj.15072)
Supplement: Supplemental Information 1 [file peerj-11-15072-s001.xlsx]

## Sheet: NEW 16 Juni
Age	Sex	Length of stay	Length of Stay_Cat	ICU	Number of drugs	Number of drugs_Cat	HT	CVD	DM	Renal	Comorbidities	Narrow_ther_index	Number of comorbidities	pDDIs D/X
48	1	7	0	0	8	0	0	0	1	0	0	0	1	1
66	0	11	1	1	13	1	0	0	1	0	0	0	1	1
77	0	4	0	1	8	0	0	1	0	0	0	0	1	0
63	1	8	1	0	13	1	1	0	1	0	0	0	2	1
62	1	8	1	0	11	1	0	0	0	1	0	0	1	1
60	0	19	1	0	16	1	0	0	1	0	0	0	1	1
75	1	11	1	1	10	1	0	1	0	0	0	1	1	0
44	1	6	0	1	10	1	1	1	0	0	0	0	2	0
70	0	9	1	0	10	1	1	0	0	0	0	0	1	0
75	1	4	0	0	5	0	0	1	0	0	0	0	1	0
58	1	4	0	0	3	0	0	0	0	1	0	0	1	1
51	1	5	0	0	17	1	0	1	1	1	1	1	4	1
58	1	7	0	0	7	0	0	0	1	0	0	0	1	0
52	0	11	1	0	12	1	1	0	0	0	0	0	1	1
51	1	4	0	0	6	0	0	0	1	0	0	0	1	1
77	0	2	0	0	8	0	0	1	0	0	0	0	1	1
67	1	4	0	0	9	1	0	1	0	0	0	0	1	0
57	0	5	0	1	8	0	0	0	1	0	0	0	1	1
55	1	7	0	0	12	1	0	0	1	0	0	0	1	1
60	0	10	1	0	11	1	1	0	1	0	0	0	2	1
57	0	20	1	0	13	1	0	0	0	0	1	0	1	1
59	0	2	0	1	7	0	0	0	1	1	0	0	2	1
103	1	8	1	0	8	0	0	0	0	0	1	0	1	1
64	0	8	1	0	11	1	0	0	1	0	0	0	1	1
25	1	7	0	0	10	1	0	0	1	0	0	0	1	0
64	0	6	0	0	7	0	0	1	0	0	0	0	1	1
61	1	11	1	0	10	1	0	0	1	0	0	0	1	0
64	0	15	1	0	9	1	0	0	1	0	0	0	1	0
51	1	4	0	0	11	1	0	0	1	0	0	0	1	0
57	0	5	0	1	10	1	0	0	1	0	0	0	1	1
39	0	7	0	1	12	1	0	0	1	0	0	0	1	1
57	0	4	0	1	12	1	0	0	1	0	0	0	1	1
58	0	3	0	0	7	0	0	1	0	1	0	0	2	0
57	0	5	0	1	11	1	0	0	0	0	1	0	1	0
43	1	14	1	0	10	1	1	0	0	0	0	0	1	1
58	0	12	1	0	13	1	1	0	0	0	0	0	1	1
46	1	6	0	1	10	1	0	0	1	0	0	0	1	0
73	1	10	1	0	9	1	0	0	0	1	0	0	1	1
40	0	2	0	1	7	0	0	0	1	0	0	0	1	0
62	0	12	1	0	11	1	0	0	1	1	0	0	2	1
41	1	7	0	1	11	1	0	0	0	1	0	0	1	1
62	1	11	1	0	7	0	0	0	1	0	1	0	2	0
80	0	4	0	0	10	1	0	1	0	0	0	1	1	1
58	0	8	1	0	13	1	1	0	1	0	0	0	2	1
49	0	4	0	1	7	0	1	0	1	0	0	0	2	0
41	0	3	0	1	8	0	0	0	1	1	0	0	2	1
66	1	18	1	0	9	1	1	0	1	0	0	0	2	1
59	0	16	1	0	9	1	1	1	0	0	0	0	2	1
67	1	8	1	1	13	1	0	0	1	0	0	0	1	1
75	0	5	0	0	6	0	1	0	0	0	0	0	1	0
76	1	5	0	0	5	0	0	1	1	0	0	0	2	0
70	0	11	1	1	10	1	0	1	0	0	0	0	1	1
29	0	2	0	1	7	0	0	0	1	0	1	0	2	0
48	1	6	0	0	9	1	0	0	0	0	1	1	1	1
65	0	10	1	1	14	1	1	0	1	0	0	0	2	1
54	1	6	0	0	10	1	0	0	1	0	0	0	1	1
52	0	6	0	1	10	1	1	0	0	0	0	0	1	0
41	1	13	1	0	14	1	1	0	0	0	0	0	1	1
48	0	7	0	0	8	0	0	0	1	0	0	0	1	0
72	0	9	1	0	12	1	0	0	1	0	1	1	2	1
70	1	7	0	1	5	0	0	0	1	0	0	0	1	0
63	1	7	0	0	9	1	1	1	0	0	0	1	2	1
50	1	8	1	0	8	0	1	0	0	0	0	0	1	1
62	1	5	0	1	9	1	0	1	0	1	0	0	2	1
61	0	7	0	0	9	1	0	0	1	0	0	0	1	0
33	0	4	0	1	9	1	0	0	1	0	1	0	2	1
58	0	8	1	1	7	0	0	0	0	1	0	0	1	0
46	0	4	0	0	6	0	0	0	0	0	1	0	1	0
53	0	4	0	1	7	0	0	0	0	1	0	0	1	0
61	1	11	1	0	8	0	1	0	0	0	0	0	1	1
47	1	4	0	0	5	0	0	0	1	0	0	0	1	0
93	0	8	1	1	8	0	0	1	0	0	0	0	1	0
51	0	8	1	0	8	0	1	0	0	0	0	0	1	1
60	1	16	1	0	10	1	0	1	1	0	0	0	2	1
63	1	5	0	0	7	0	1	1	0	0	0	0	2	0
55	1	3	0	1	6	0	0	0	0	1	0	0	1	0
58	0	4	0	0	7	0	0	0	1	0	0	0	1	1
53	1	12	1	0	7	0	1	0	0	0	0	0	1	1
67	0	19	1	0	12	1	1	0	0	0	1	0	2	1
62	1	3	0	1	10	1	0	1	0	0	0	0	1	1
64	0	10	1	0	10	1	1	0	0	0	0	0	1	1
26	0	18	1	0	9	1	0	0	0	0	1	0	1	1
56	1	8	1	0	9	1	1	0	0	0	0	0	1	1
61	0	3	0	0	8	0	0	0	1	0	0	0	1	1
48	1	11	1	0	7	0	0	0	0	0	1	0	1	0
53	0	7	0	0	9	1	0	0	1	0	0	0	1	0
53	1	13	1	0	17	1	0	1	1	0	0	0	2	0
43	0	21	1	0	12	1	0	0	1	0	0	0	1	1
33	0	4	0	1	6	0	0	0	1	0	0	0	1	0
49	1	9	1	0	10	1	1	0	0	0	0	0	1	1
62	0	11	1	0	10	1	0	1	1	0	0	0	2	1
31	0	8	1	1	9	1	0	0	1	0	1	0	2	1
46	0	8	1	0	7	0	1	0	1	1	0	0	3	1
21	0	6	0	1	10	1	0	0	0	0	1	1	1	1
52	0	6	0	0	13	1	0	1	1	0	0	0	2	1
62	0	22	1	1	13	1	1	0	0	0	0	0	1	1
40	0	13	1	0	9	1	0	0	1	0	0	0	1	1
26	1	15	1	0	8	0	0	0	1	0	0	0	1	1
60	1	6	0	0	9	1	0	0	1	0	0	0	1	0
68	0	5	0	0	6	0	0	0	1	0	0	0	1	0
66	1	4	0	0	6	0	0	0	0	1	0	0	1	1
63	0	9	1	0	7	0	0	0	1	0	0	0	1	1
55	1	7	0	0	8	0	0	0	1	1	0	0	2	0
30	1	6	0	0	8	0	0	0	1	0	0	0	1	1
41	0	4	0	0	7	0	0	0	1	1	0	0	2	0
68	1	21	1	1	13	1	0	0	1	1	0	0	2	1
41	1	10	1	0	9	1	1	0	0	0	0	0	1	0
60	1	8	1	0	9	1	0	0	1	0	0	0	1	1
71	1	10	1	1	19	1	1	0	1	0	0	0	2	1
65	0	10	1	0	11	1	1	0	1	0	1	0	3	1
30	0	21	1	0	11	1	0	0	0	0	1	0	1	1
44	1	3	0	0	7	0	0	1	0	1	0	0	2	1
68	1	9	1	1	11	1	0	0	0	0	1	0	1	1
64	0	7	0	1	15	1	0	1	0	0	0	0	1	1
59	1	12	1	0	8	0	0	0	1	0	0	0	1	1
51	0	3	0	0	7	0	0	0	1	0	0	0	1	1
65	0	13	1	0	12	1	1	0	0	0	0	0	1	1
65	0	9	1	0	11	1	1	0	1	0	0	0	2	1
62	1	6	0	0	10	1	0	0	1	0	0	0	1	1
59	1	8	1	0	11	1	0	1	0	1	0	0	2	1
60	0	12	1	0	9	1	1	0	1	0	0	0	2	1
55	1	13	1	0	10	1	0	1	1	0	0	0	2	0
57	1	9	1	0	13	1	0	1	0	0	0	0	1	1
64	0	8	1	1	10	1	0	0	1	0	0	0	1	0
48	1	6	0	1	15	1	0	0	1	0	0	0	1	0
65	1	9	1	0	12	1	0	1	0	0	0	0	1	1
57	1	12	1	0	9	1	0	0	1	0	0	0	1	1
23	0	2	0	0	7	0	1	0	0	0	0	0	1	0
61	0	12	1	0	10	1	0	1	0	0	0	1	1	1
65	1	7	0	0	8	0	0	0	1	1	0	0	2	1
59	0	4	0	0	9	1	0	0	0	1	0	0	1	1
50	0	9	1	1	8	0	0	0	1	0	0	0	1	1
66	0	7	0	0	8	0	0	0	1	0	0	0	1	0
53	0	5	0	1	7	0	0	0	1	0	0	0	1	0
62	0	11	1	0	11	1	1	0	1	0	0	0	2	1
75	1	4	0	0	8	0	0	0	1	0	0	0	1	0
69	1	9	1	0	7	0	0	0	1	0	0	0	1	1
50	0	7	0	0	6	0	0	0	1	0	0	0	1	1
57	0	7	0	0	7	0	1	0	1	0	0	0	2	1
45	1	9	1	0	12	1	0	1	0	0	0	0	1	1
67	1	4	0	0	8	0	0	0	0	1	0	0	1	1
56	0	11	1	1	14	1	0	0	0	0	1	0	1	1
46	0	12	1	1	15	1	0	0	1	0	0	0	1	1
57	1	8	1	1	11	1	1	0	0	0	0	0	1	1
55	1	11	1	0	9	1	1	1	0	0	0	0	2	0
64	1	9	1	1	12	1	1	0	0	0	0	0	1	1
73	1	6	0	0	8	0	0	0	1	0	0	0	1	0
57	1	13	1	0	11	1	0	1	1	0	0	0	2	0
61	0	11	1	1	10	1	0	0	1	0	0	0	1	1
53	0	2	0	0	4	0	0	0	1	0	0	0	1	0
80	1	11	1	0	9	1	0	0	1	0	0	0	1	1
60	0	7	0	1	8	0	0	0	1	0	0	0	1	1
61	1	5	0	0	9	1	1	0	1	0	0	0	2	1
43	0	6	0	0	6	0	0	0	1	0	0	0	1	0
69	0	10	1	0	10	1	0	0	1	0	0	0	1	1
61	1	4	0	1	11	1	0	0	1	0	0	0	1	1
62	1	11	1	1	12	1	0	0	1	0	0	0	1	1
71	1	3	0	0	9	1	0	0	1	0	0	0	1	1
54	0	9	1	0	10	1	0	0	0	0	1	0	1	1
62	1	13	1	0	13	1	0	0	1	0	0	0	1	1
74	0	6	0	0	5	0	0	0	1	0	1	0	2	1
24	1	4	0	0	5	0	0	0	0	0	1	0	1	0
32	0	14	1	0	12	1	0	1	0	0	1	1	2	1
55	0	9	1	0	12	1	1	0	1	0	0	0	2	1
53	1	13	1	0	15	1	0	0	1	0	0	0	1	1
62	1	8	1	0	8	0	0	0	1	1	0	0	2	1
65	1	5	0	0	12	1	0	0	1	0	0	0	1	1
54	0	9	1	0	9	1	0	0	1	0	0	0	1	1
56	0	6	0	0	8	0	0	0	1	0	0	0	1	1
57	0	3	0	1	6	0	1	0	0	1	0	0	2	1
60	0	7	0	0	7	0	0	1	0	0	0	1	1	1
45	1	5	0	0	6	0	1	0	0	0	0	0	1	1
41	0	8	1	1	11	1	0	0	1	0	0	0	1	1
54	0	5	0	0	7	0	0	0	1	0	0	0	1	0
72	1	13	1	0	11	1	1	0	1	0	0	0	2	1
45	1	8	1	0	7	0	0	0	1	0	0	0	1	0
64	1	7	0	0	10	1	0	0	1	1	0	0	2	1
56	1	4	0	0	9	1	0	1	0	1	0	0	2	1
68	1	5	0	0	8	0	1	0	0	0	0	0	1	1
41	0	7	0	1	13	1	0	0	1	0	0	0	1	1
55	0	6	0	1	8	0	0	0	1	0	1	0	2	0
48	0	11	1	0	7	0	0	0	1	0	0	0	1	1
64	0	3	0	0	5	0	0	0	1	0	0	0	1	0
68	1	5	0	0	9	1	0	0	0	1	0	0	1	1
53	1	11	1	0	11	1	1	1	1	0	0	0	3	1
38	0	5	0	1	9	1	0	0	1	0	0	0	1	1
59	1	7	0	0	15	1	0	1	0	0	0	0	1	1
76	1	7	0	0	11	1	1	0	0	0	0	0	1	1
71	1	3	0	0	7	0	0	0	1	0	0	0	1	1
64	1	16	1	0	11	1	0	0	0	1	0	0	1	1
52	1	12	1	0	13	1	1	0	0	0	0	0	1	1
55	1	3	0	0	9	1	0	0	1	0	0	0	1	1
67	0	7	0	0	6	0	0	1	0	0	0	0	1	0
54	0	3	0	0	8	0	0	0	1	1	1	1	3	1
80	1	3	0	0	6	0	0	0	0	0	1	0	1	1
51	1	2	0	1	9	1	0	0	1	0	0	0	1	1
53	0	8	1	1	10	1	0	0	1	0	0	0	1	1
69	0	2	0	0	7	0	1	1	1	0	0	0	3	1
69	0	3	0	1	10	1	1	0	1	0	0	0	2	1
52	0	4	0	1	9	1	0	0	1	0	0	0	1	1
61	0	3	0	0	6	0	0	0	1	0	0	0	1	0
55	1	11	1	0	12	1	0	0	1	0	0	0	1	1
57	0	3	0	1	12	1	0	1	1	0	0	0	2	1
64	1	2	0	1	7	0	0	0	1	0	0	0	1	0
35	1	6	0	1	7	0	0	0	0	0	1	0	1	1
58	1	9	1	1	7	0	0	0	1	0	0	0	1	1
55	0	4	0	1	9	1	1	0	1	0	0	0	2	0
67	1	17	1	0	14	1	0	1	0	0	0	0	1	1
58	1	5	0	1	9	1	1	0	0	0	0	0	1	1
70	1	4	0	1	14	1	0	1	0	0	0	1	1	1
56	0	7	0	0	10	1	0	0	0	0	1	0	1	0
65	0	5	0	0	8	0	0	0	1	0	0	0	1	1
67	0	5	0	0	7	0	0	0	1	0	0	0	1	1
36	0	9	1	0	11	1	1	0	0	0	0	0	1	1
40	0	11	1	0	8	0	0	0	1	0	0	0	1	1
34	0	3	0	1	9	1	1	0	0	1	0	0	2	0
69	0	7	0	0	8	0	0	0	1	0	0	0	1	0
58	0	5	0	1	8	0	0	0	1	0	0	1	1	1
68	1	7	0	0	14	1	1	0	1	0	0	0	2	1
61	0	11	1	0	8	0	0	0	0	0	1	0	1	1
48	0	21	1	0	14	1	0	0	1	0	0	0	1	1
47	0	5	0	1	10	1	0	0	1	0	0	0	1	1
55	0	8	1	0	10	1	0	0	1	0	0	0	1	0
54	1	7	0	0	13	1	0	0	0	1	0	0	1	1
40	1	11	1	0	11	1	0	0	1	0	0	0	1	1
64	0	10	1	0	12	1	0	1	0	0	0	0	1	1
59	1	12	1	1	16	1	0	1	0	0	0	1	1	1
50	1	22	1	0	10	1	0	0	0	1	0	0	1	1
59	0	18	1	0	13	1	0	0	0	0	1	0	1	1
47	1	9	1	0	10	1	0	0	0	1	0	0	1	1
61	1	5	0	0	10	1	1	1	1	1	0	0	4	1
60	1	11	1	0	10	1	0	0	0	1	0	0	1	1
61	0	11	1	0	13	1	0	0	1	0	0	0	1	1
65	0	14	1	0	11	1	0	0	1	0	0	0	1	1
43	0	8	1	0	9	1	0	0	1	0	0	0	1	1
58	0	11	1	1	11	1	0	0	1	0	0	0	1	1
67	0	8	1	0	13	1	0	1	0	0	0	0	1	1
67	1	4	0	1	10	1	0	1	0	0	0	0	1	1
57	0	3	0	0	8	0	0	0	0	1	0	0	1	1
73	0	5	0	0	8	0	1	0	1	0	0	0	2	1
62	0	3	0	0	10	1	0	0	1	0	0	0	1	1
58	1	6	0	0	12	1	1	1	0	0	0	0	2	1
54	0	10	1	0	12	1	0	0	1	0	1	0	2	1
50	1	9	1	0	8	0	0	0	0	0	1	0	1	1
63	1	3	0	1	8	0	0	1	1	0	0	0	2	1
53	1	2	0	1	6	0	0	1	0	0	0	0	1	1
46	1	12	1	0	8	0	0	0	1	0	0	0	1	1
49	0	11	1	0	10	1	0	0	1	0	0	0	1	1
51	1	8	1	0	6	0	1	0	0	1	0	0	2	0
59	0	2	0	1	11	1	1	0	0	0	0	0	1	1
63	0	4	0	0	5	0	0	0	0	0	1	0	1	0
81	1	14	1	1	13	1	1	0	1	0	0	0	2	1
68	0	6	0	0	9	1	0	0	1	0	0	0	1	1
59	0	12	1	1	8	0	0	0	1	1	0	0	2	1
42	0	4	0	1	8	0	0	0	0	1	0	0	1	0
64	0	4	0	0	8	0	0	0	0	1	0	0	1	1
60	0	11	1	0	8	0	1	0	0	0	0	0	1	1
